# Supplementary material for: Delayed Initiation but Not Gradual Advancement of Enteral Formula Feeding Reduces the Incidence of Necrotizing Enterocolitis (NEC) in Preterm Pigs
Source: PubMed Central journal article supplement (PMC4169518; doi:10.1371/journal.pone.0106888), 2014-09-19
Supplement: pone.0106888.s002.pdf [file pone.0106888.s002.pdf]

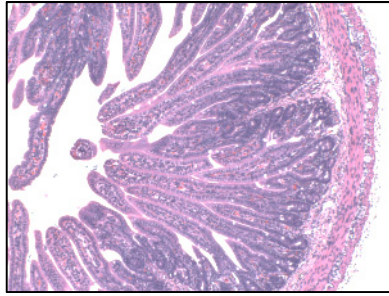

**EA-Intact protein-No NEC**

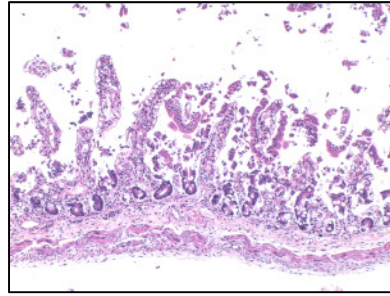

**EA-Intact protein-NEC**

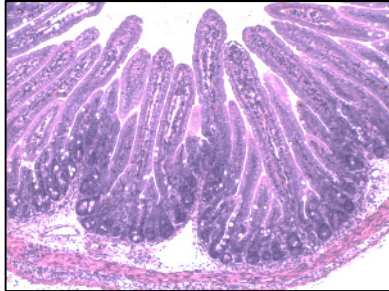

**EA-Hydrolyzed protein-No NEC**

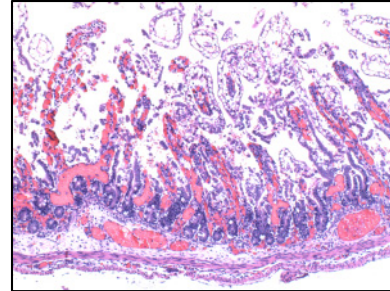

**EA-Hydrolyzed protein-NEC**

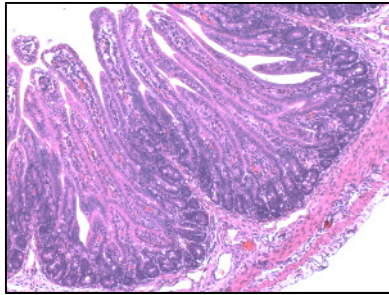

**LA-Intact protein-No NEC**

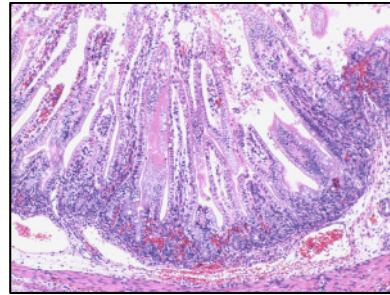

**LA-Intact protein-NEC**

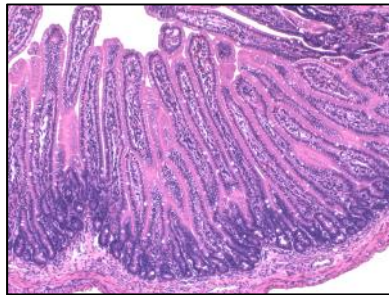

**LA-Hydrolyzed protein-No NEC**

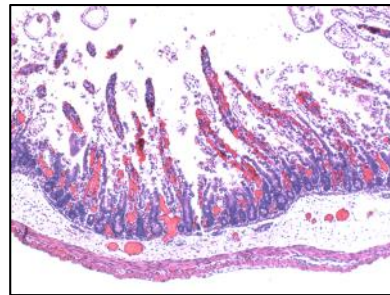

**LA-Hydrolyzed protein-NEC**

**Panel A**

**Figure S2**

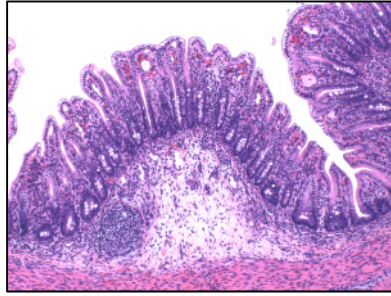

**EA-Intact protein-No NEC**

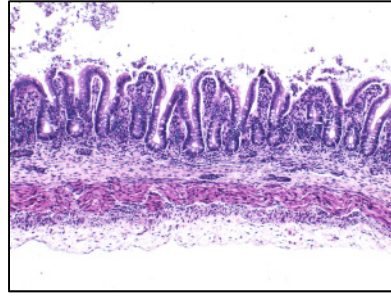

**EA-Intact protein-NEC**

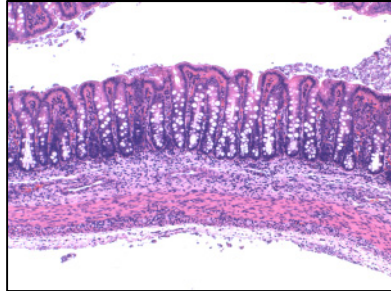

**EA-Hydrolyzed protein-No NEC**

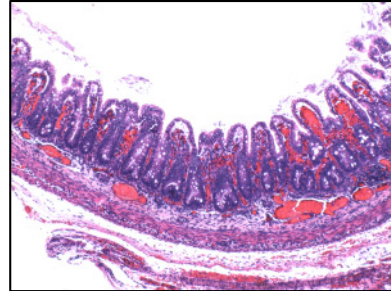

**EA-Hydrolyzed protein-NEC**

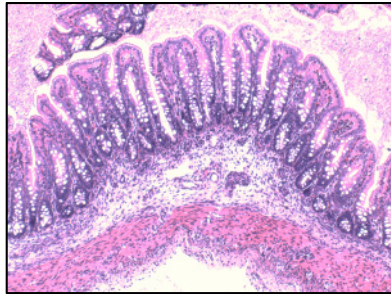

**LA-Intact protein-No NEC**

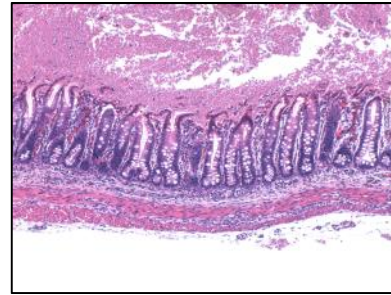

**LA-Intact protein-NEC**

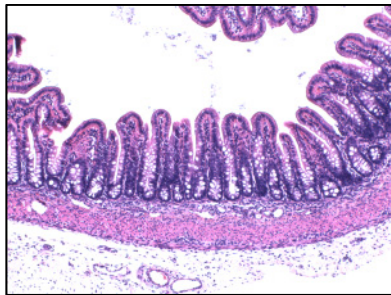

**LA-Hydrolyzed protein-No NEC**

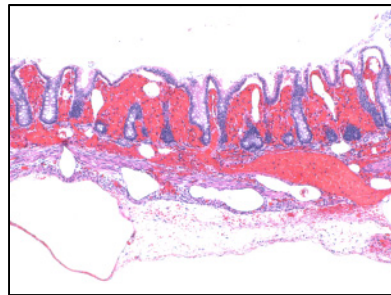

**LA-Hydrolyzed protein-NEC**

**Panel B**

**Figure S2**
