# Supplementary material for: Delayed Initiation but Not Gradual Advancement of Enteral Formula Feeding Reduces the Incidence of Necrotizing Enterocolitis (NEC) in Preterm Pigs
Source: PubMed Central journal article supplement (PMC4169518; doi:10.1371/journal.pone.0106888), 2014-09-19
Supplement: pone.0106888.s003.pdf [file pone.0106888.s003.pdf]

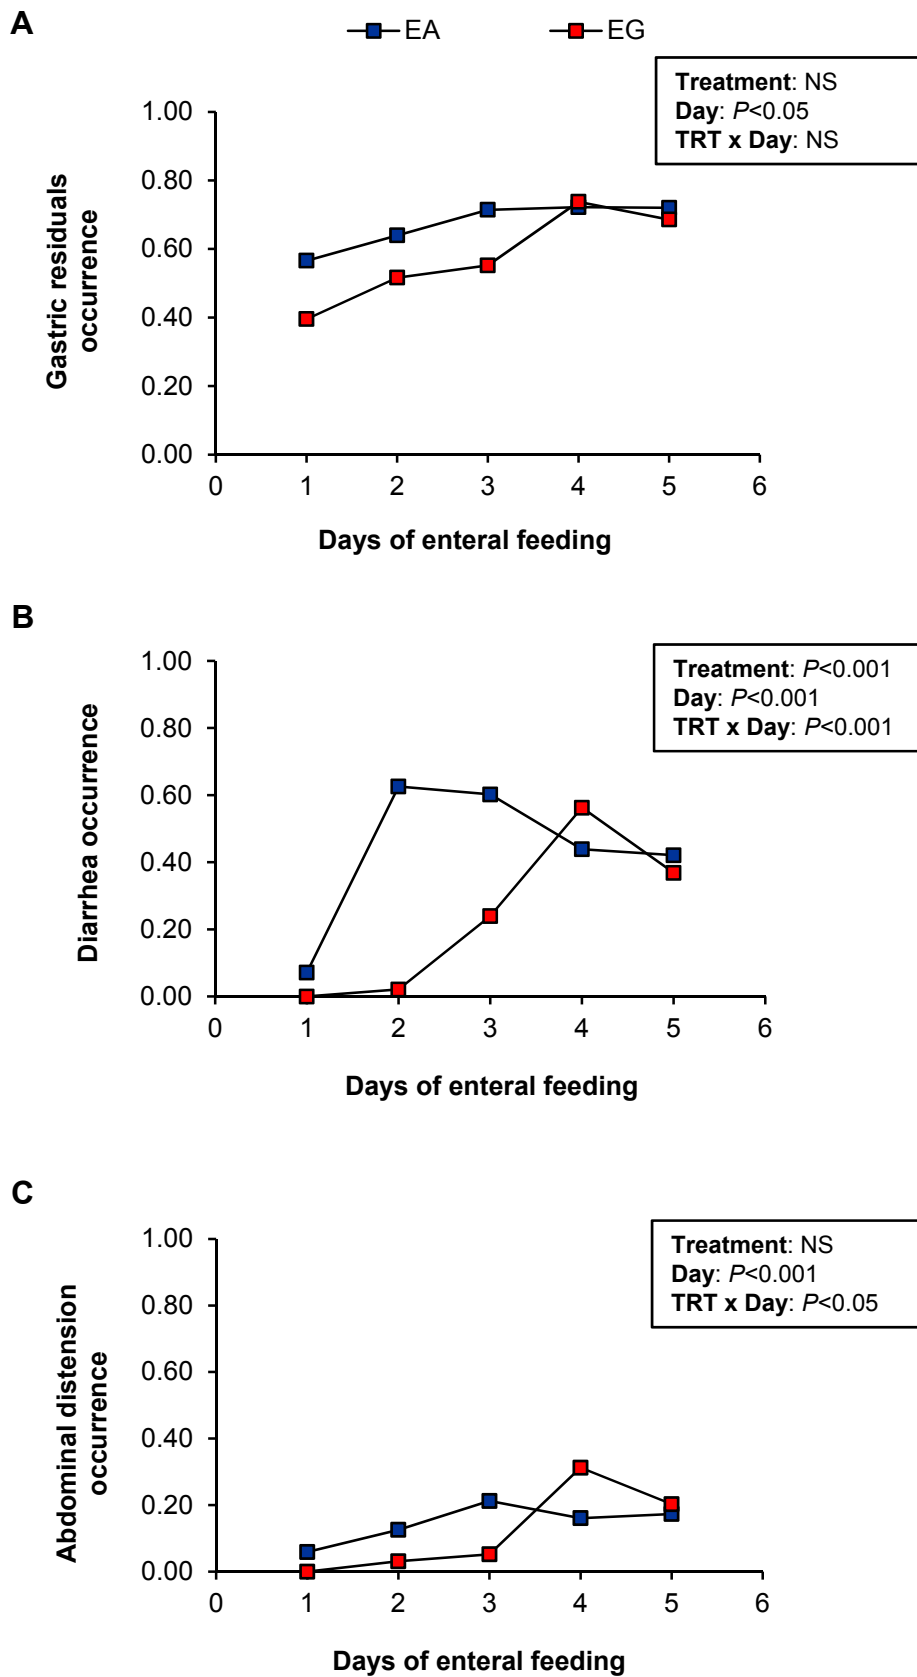

Figure S3
